# Supplementary material
Source: publisher figshare collection journal article supplement (https://acs.figshare.com/ndownloader/files/9126370)
Supplement: Supplementary file 1 [file 9126370]

## Supporting Information

### Island-like Nanoporous Gold:Smaller Island Generates Stronger Surface-Enhanced Raman Scattering

Jinglin Huang,<sup>†</sup>Zhibing He,<sup>†</sup> Xiaoshan He,<sup>†</sup>Yansong Liu,<sup>†</sup>Tao Wang,<sup>†</sup> Guo Chen,<sup>†</sup> Cuilan Tang,<sup>†,‡</sup>

Ru Jia,<sup>§</sup> Lei Liu,<sup>†,‡</sup> Ling Zhang,<sup>†</sup> Jian Wang,<sup>†</sup> Xing Ai,<sup>†</sup> Shubing Sun,<sup>†</sup>Xiaoliang Xu,<sup>||</sup>and Kai Du<sup>†,⊥,\*</sup>

<sup>⊥,\*</sup>

<sup>†</sup>Research Center of Laser Fusion, China Academy of Engineering Physics, Mianyang 621900, PR China

<sup>‡</sup>School of Material Science and Engineering, Southwest University of Science and Technology, Mianyang 621010, PR China

<sup>§</sup>Analytic and Testing Center, Southwest University of Science and Technology, Mianyang 621010, PR China

<sup>||</sup> School of Physical Sciences, University of Science and Technology of China, Hefei 230026, PR China

<sup>⊥</sup>Collaborative Innovation Center of IFSA (CICIFSA), Shanghai Jiao Tong University, Shanghai 200240, China

\*Corresponding author:

E-mail:dukai@caep.cn

Table S1 Ag content (at.%) of the prepared samples before and after dealloying. It should be noted that the measured Ag content is underestimated because of an additional ~3 nm Au layer was deposited on the sample before SEM measurement to enhance the electrical conductivity. We believe these data are enough for the relative comparisons of the samples. Besides, residual Ag of NPG sample is much more than INPG samples after 1.5 h dealloying. We think this should be attributed to the larger contacting areas of the ligaments of INPG with the electrolyte than NPG.

|        | Before dealloying | 15 min dealloying | 1.5 h dealloying |
|--------|-------------------|-------------------|------------------|
| INPG9  | 91.09±0.44        | 6.82±0.87         | 2.31±0.89        |
| INPG13 | 87.38±0.59        | 8.95±1.13         | 2.13±0.96        |
| INPG18 | 81.96±0.83        | 7.57±0.83         | 2.27±0.76        |
| NPG    | 66.58±1.22        | 20.71±1.35        | 16.31±1.99       |

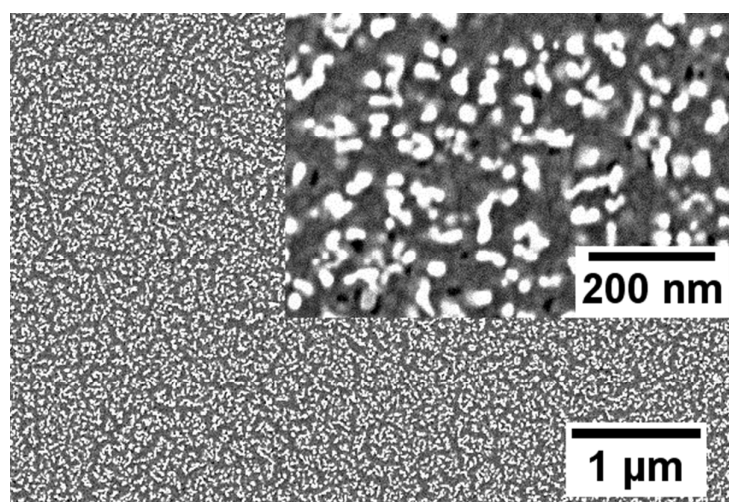

Figure S1. Microstructure of the gold nanostructure by dealloying  $\text{Au}_{3.9}\text{Ag}_{96.1}$  alloy precursor for 1.5 h. It presents as gold nanoparticle morphology.

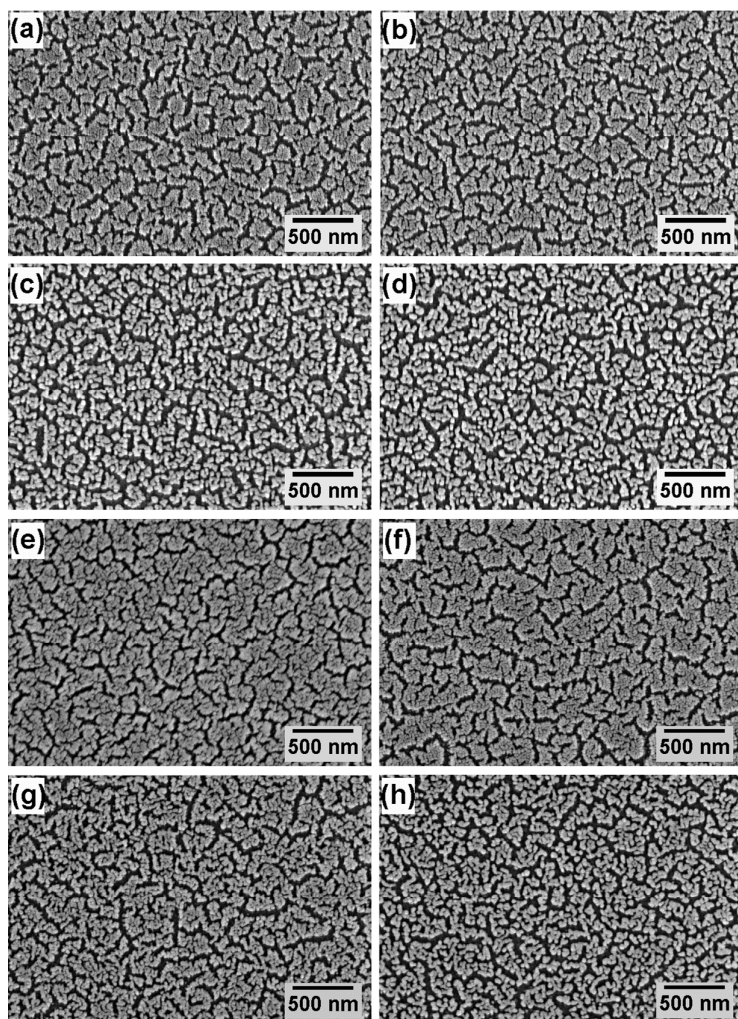

Figure S2. SEM micrographs of INPG9 and INPG13 with different dealloying times to present their morphological evolutions. (a–e) The surface morphologies of INPG9: (a) 0.25 min, (b) 1.5 min, (c) 15 min, (d) 60min. (e–h) The surface morphologies of INPG13: (e) 0.25 min, (f) 1.5 min, (g) 15 min, (h) 60min.

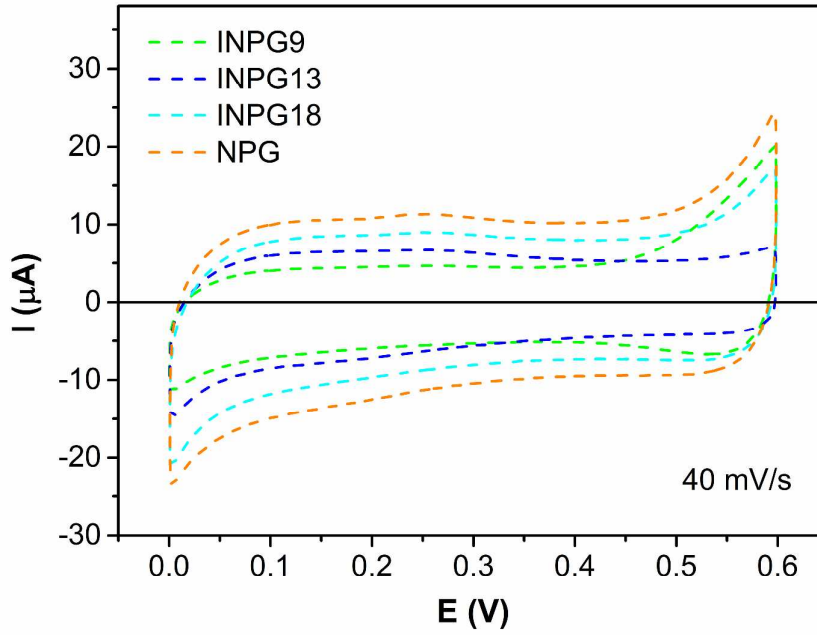

Figure S3. Cyclic voltammograms of current  $I$  versus electrode potential  $E$  in the nominally capacitive regime of prepared INPG and NPG samples with the scan rate as 40 mV/s.

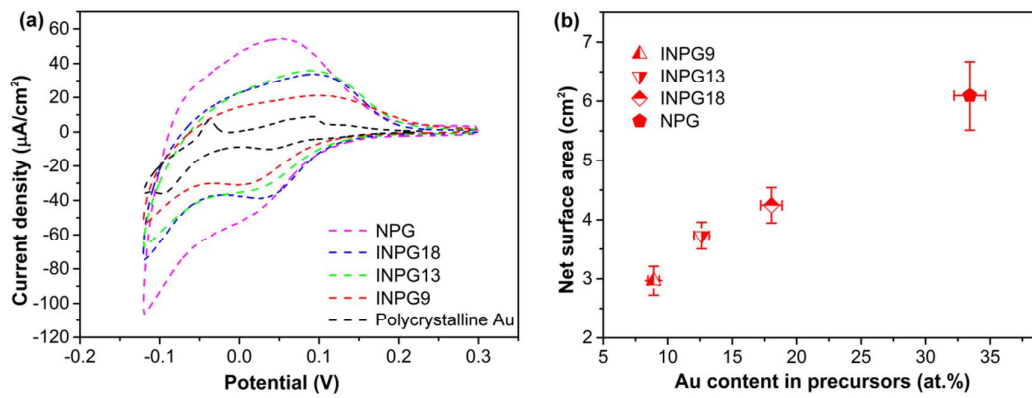

Figure S4. The Cu UPD measurements of the prepared samples for the surface area characterizations. (a) Cyclic voltammograms of Cu UPD measurements. (b) The estimated net surface areas of INPG and NPG samples versus Au content in precursors. The polycrystalline Au film was measured as reference.

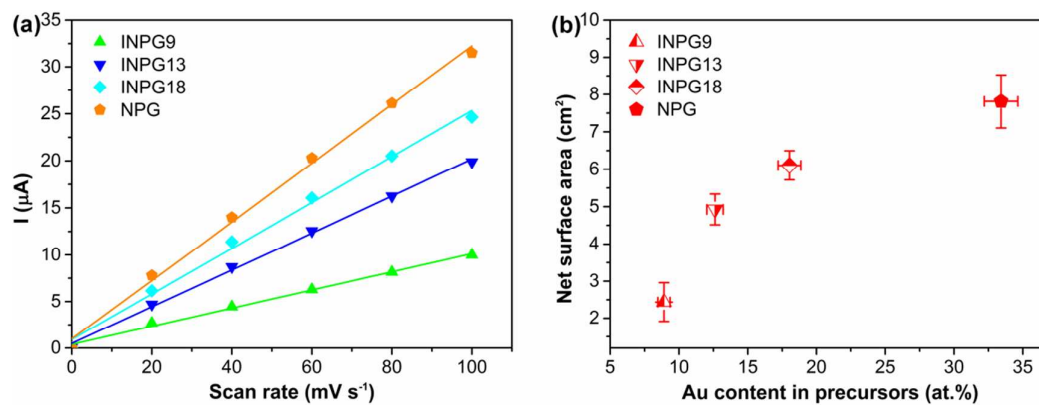

Figure S4. Surface area characterization of INPG and NPG films dealloying by 15 min. (a) Mean current magnitude  $I_c$  at  $E = 0.3 V$  of cyclic voltammograms measurement versus the scan rate. (b) The estimated net surface areas versus Au content in precursors.

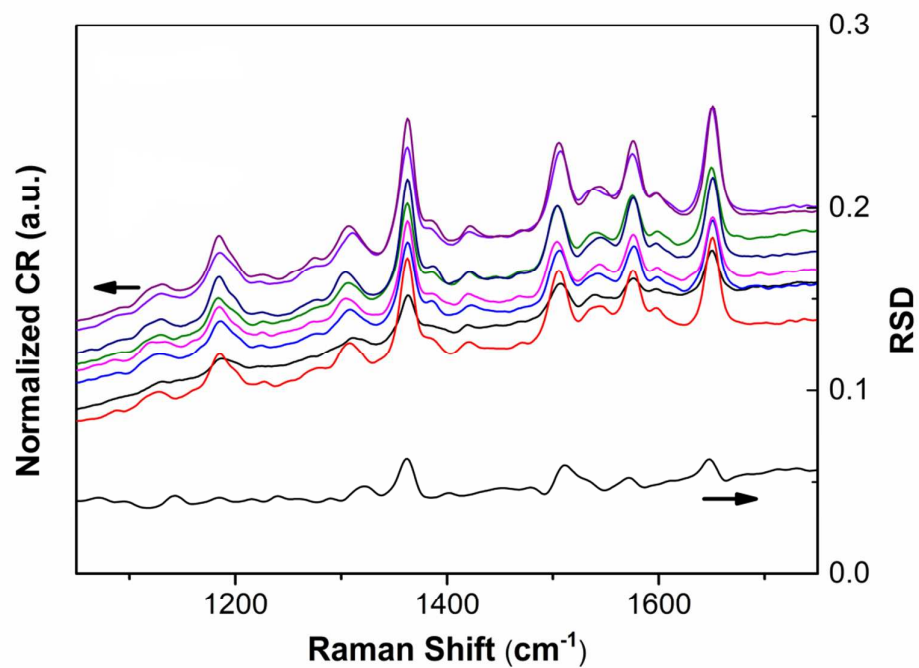

Figure S5. SERS spectra and corresponding RSD values of  $10^{-7} M$  R6G on eight replicate INPG9 samples to evaluate the reproducibility of these samples.

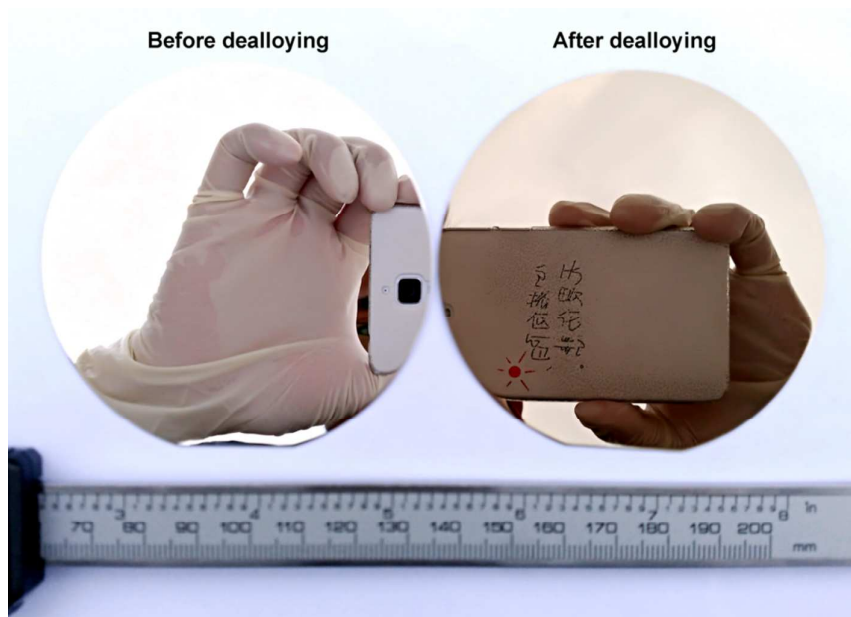

Figure S6. Photograph of the INPG9 fabricated on 3 inch wafers before and after dealloying shows a specular result. The as-deposited film appears a silver color, while it appears faint yellow after dealloying.

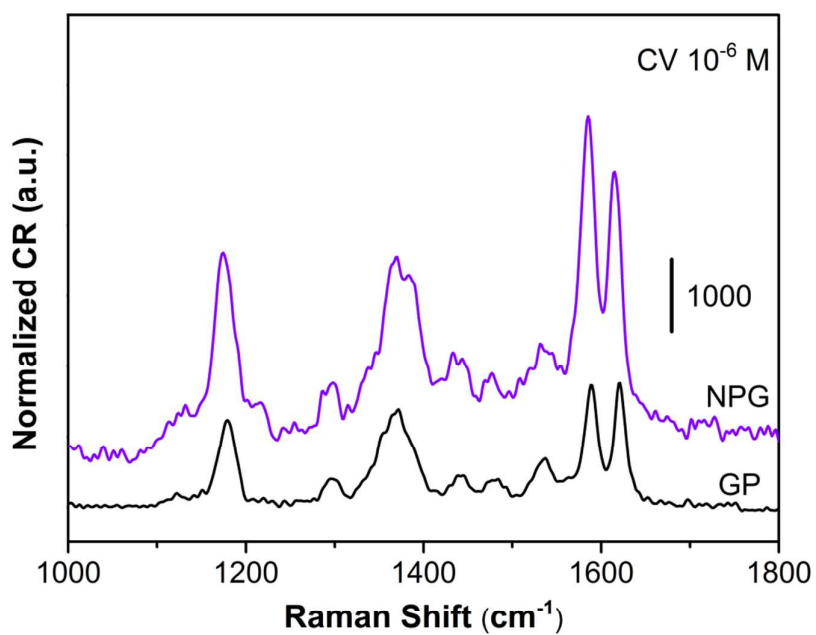

Figure S7. Comparison of SERS spectra between NPG and GP substrates with  $10^{-6}$  M CV as the probe molecules. The GP was fabricated by dealloying  $\text{Au}_{3.9}\text{Ag}_{96.1}$  alloy precursor. The excitation wavelength is 514 nm.
